# Supplementary material
Source: PubMed Central journal article supplement (PMC8566266)
Supplement: kiab237_supplementary_data.pdf [file kiab237_supplementary_data.pdf]

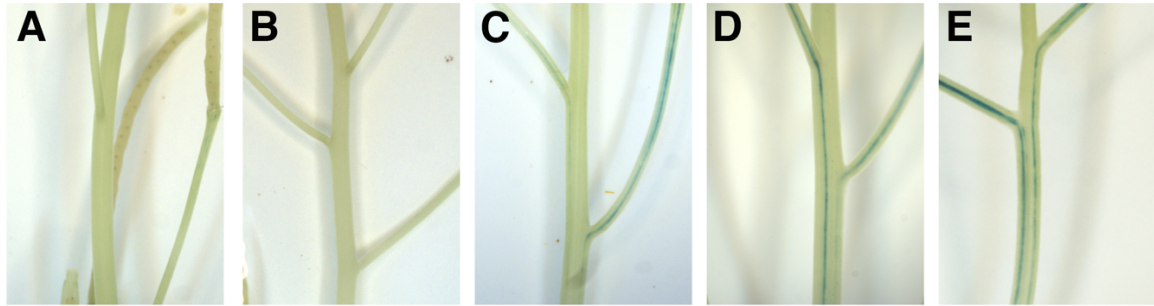

**Supplementary Figure S1.** Auxin response patterns in the ZFD during active and quiescent stages of inflorescence development. Patterns of *DR5:GUS* activity displayed in the ZFD during (A) active inflorescence development. During the end of flowering transition, patterns of *DR5:GUS* activity shown in ZFD at the (B-D) Q1 and (E) Q2 stages of growth arrest. (B and C) At the Q1 stage, 63% of the inflorescences displayed little or no *DR5:GUS* activity in the ZFD. (D) However, 37% of Q1 inflorescences showed *DR5:GUS* activity in the ZFD.
